# Supplementary material for: Building a cloud in the Southeast Atlantic: Understanding low-cloud controls based on satellite observations with machine learning
Source: Copernicus journal article supplement (doi:10.5194/acp-2018-593), 2018-07-09
Supplement: Supplementary file [file acp-2018-593-AC2-supplement.pdf]

1 Response to interactive comment of anonymous  
2 referee 2 —

3 Julia Fuchs<sup>1, 2</sup>, Jan Cermak<sup>1, 2</sup>, and Hendrik Andersen<sup>1, 2</sup>

4 <sup>1</sup>Institute of Meteorology and Climate Research, Karlsruhe Institute of Technology (KIT),  
5 Karlsruhe, Germany.

6 <sup>2</sup>Institute of Photogrammetry and Remote Sensing, Karlsruhe Institute of Technology  
7 (KIT), Karlsruhe, Germany.

8 contact: [julia.fuchs@kit.edu](mailto:julia.fuchs@kit.edu)

9 This manuscript disentangles aerosol effects on the southeast Atlantic stratocu-  
10 muls deck from meteorological effects through the use of a machine learning  
11 approach labeled Gradient Boosting Regression Trees (GBRTs). It is welcome  
12 to see a recognition of both impacts, and the use of an innovate approach to  
13 discriminate them. The use of `lat_src` and `lon_src` is nice. The results are sensi-  
14 ble. I do however feel the study suffers from over-interpretation. One concern is  
15 the focus on only the cloud fraction and the cloud effective radius (REF) as the  
16 cloud properties. While the REF is influenced by aerosol, it is also a function  
17 of the liquid water path. A more straightforward physical relationship is that  
18 between AOD (CCN) and the cloud droplet number concentration (Nd), which  
19 can be estimated as a function of REF and the cloud optical depth. Cloud  
20 deepening is likewise better interpreted through the use of LWP than of REF.  
21 Another concern is the lumping of July-August-September. It is by now well  
22 appreciated that the biomass-burning aerosol is more likely to be present within  
23 the boundary layer in July, moving up in altitude through September, when it  
24 is more likely to be above the cloudy boundary layer. Different cloud responses  
25 would be anticipated as a function of the month. A useful additional analysis  
26 is to examine the GBRT results as a function of month, and interpret them as  
27 a function of the varying cloud-aerosol vertical structure.

28 The study was designed to focus on cloud fraction and cloud effective radius  
29 in order to test and interpret the GBRT models on one relevant micro- and  
30 one relevant macrophysical cloud property during the biomass-burning season.  
31 Using the cloud droplet number concentration is appreciated, however, as it  
32 is derived from COT and REF, and based on assumptions on cloud vertical  
33 profile, additional uncertainties would be introduced (Grosvenor et al., 2018).  
34 We chose to avoid this, because we try to capture the cloud system as com-  
35 pletely as possible with the statistical model. As such, we include information

36 on factors that also determine LWP. As variability among these LWP-predictors  
 37 is simulated in the computation of the sensitivities, we thereby indirectly con-  
 38 strain LWP effects on REF. To account for the referee’s suggestion LWP as an  
 39 essential cloud property is analyzed and results support the interpretation of  
 40 cloud thickening under stable conditions in all subregions (Fig. 1a), as well as  
 41 during westerly disturbances, especially in the western subregions (Fig. 1b).  
 42 In the manuscript the LWP-effects refer to outcomes of a comparable study by  
 43 Fuchs et al. (2017) where LWP is discussed and ‘self-constraining model’ is now  
 detailed more clearly.

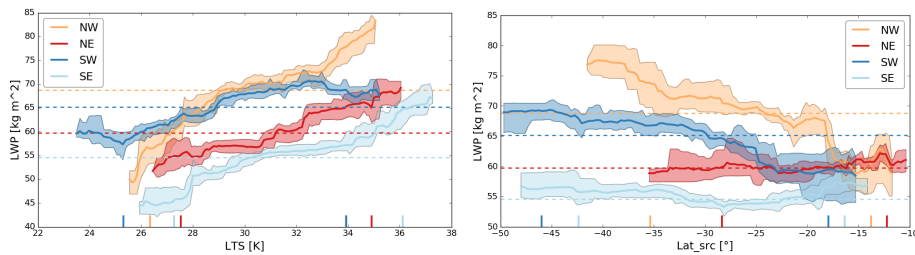

Figure 1: Mean partial dependence of LWP on LTS (left) and source latitude of air mass (right) in the four subregions (colors).

44  
 45 The aggregation of the months July-August-September (JAS) was conducted  
 46 for better comparability to previous studies (Painemal et al., 2014; Andersen  
 47 and Cermak, 2015; Adebisi and Zuidema, 2018) investigating the same season.  
 48 While we agree with referee 2, changes of the aerosol and boundary layer occur  
 49 on all scales, so that the assumptions outlined by referee 2 need to be made  
 50 independent of scale. The intraseasonal variability contained in the training of  
 51 the GBRT model contribute to the relationships during the investigated season  
 52 and must be taken into account for the interpretation of results. For this  
 53 reason, we have now computed monthly GBRT models and included the results  
 54 concerning the aerosol-cloud relationships in the manuscript. The following  
 55 figure and text are added to the manuscript. ”Figure 7 shows AOD-REF

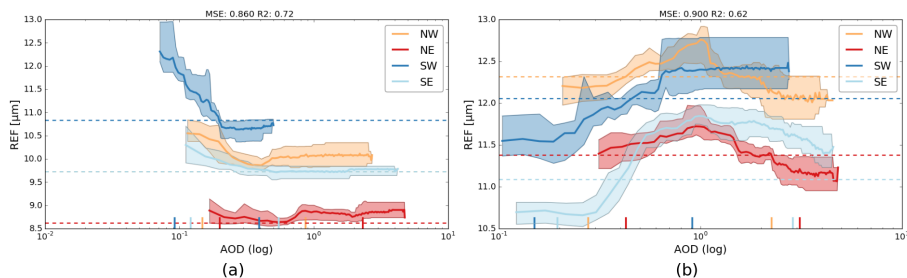

Figure 2: Mean partial dependence of REF on AOD in the four subregions (colors) in July (a) and September (b).

56 partial dependencies for the months of July and September separately. While  
 57 during July, REF seems to decrease with increasing AOD, especially in the  
 58 SW subregion, during September the opposite relationship is found. The con-  
 59 trasting relationships may be related to differences in the vertical distribution  
 60 of aerosols and clouds in the Southeast Atlantic. During July, aerosol and  
 61 cloud layers are frequently entangled, facilitating ACI, whereas in September  
 62 they can be well separated (Adebiyi et al. 2018). During this time, absorbing  
 63 aerosol may increase the stability and trap humidity in the boundary layer,  
 64 potentially leading to the observed relationship. The JAS partial dependence  
 65 between AOD and REF can thus be viewed as a summary of these patterns.  
 66 However, it is not the study’s focus to separate the different aerosol effects  
 67 mentioned earlier, but to analyze the overall influence of aerosols on clouds  
 68 during the biomass-burning season.”(p.14, l.10)

69

70 **Other comments follow:**

- 71 1. I am not completely comfortable with the use of the 8-day MODIS L3  
 72 product used as opposed to shorter time scale, as the 8-day time scale will  
 73 average over the synoptic time scale and is far longer than the cloud adjustment

74 time scale of 1-2 days. The authors mention that an 8-day time scale "allows  
75 for the large-scale and thermodynamic forcings of cloud properties to be  
76 combined", but I remain unclear what this means exactly. In several places in  
77 the manuscript the authors refer to processes that occur at much smaller time  
78 scales, such as the cloud microphysical response to aerosol. Instead it seems  
79 to me the 8-day time scale is primarily capturing a portion of the monthly  
80 evolution in the aerosol-cloud vertical structure and seasonal meteorological  
81 cycle. Also, the 8-day time scale should be explicitly mentioned in the abstract.  
82 The study focuses on processes on aggregated time scales (8-day), assuming  
83 that cloud adjustments due to aerosols, though acting on smaller time scales,  
84 are detectable in the aggregated data set at the same time as changes of  
85 thermodynamic and dynamic conditions. While daily or hourly data might  
86 underestimate e.g. the effect of LTS on the cloud cover, the influence of aerosols  
87 on the cloud cover might be underestimated by the 8-day aggregation. In  
88 particular, since aerosol and cloud properties are not retrieved at the same time  
89 in a given location. Eight-day averages are taken to represent the mean states  
90 of both at that time scale. These aspects are important and now more explicitly  
91 addressed in the manuscript. "The temporal resolution of 8 days allows to  
92 combine large-scale, thermodynamic and aerosol forcings of cloud properties  
93 simultaneously on a synoptical scale. However, it must be taken into account  
94 that clouds adjust on different time scales (hours to several days) to their  
95 environment (Klein, 1997; McCoy et al., 2017; Adebisi and Zuidema, 2018) and  
96 thus processes relevant on shorter time scales might be underrepresented in the  
97 data set."(p.3, l.8) The 8-day time scale is now introduced in the abstract (p.1,  
98 l.5).

99 2. an issue with using the relative humidity at 950 hPa is that changes in  
100 RH are more likely to reflect co-variations with other factors such as the

101 cold-temperature advection (I suspect this explains the stronger relationship  
102 between RH\_950hpa and REF in the SE sub-region) and cloud-top inversion  
103 strength. Have the authors examined the cross-correlations between their  
104 predictors?

105 Thank you for pointing out this issue. Correlations between the predictors  
106 were examined in advance and influenced the choice of predictors to reduce the  
107 covariation. Cold-temperature advection and cloud-top inversion strength are  
108 not explicitly chosen as predictors, but are assumed to be represented in the  
109 data set by other parameters such as wind speed, sea surface temperature and  
110 LTS. The manuscript is modified on p.6, l.26: "The predictor set was selected  
111 in a way to reduce covariation."

112 3. how is it that the machine learning approach is able to grasp non-linear  
113 relationships? The description of the technique presented on p. 4 still seems to  
114 present it as a basically linear technique.

115 The GBRT algorithm is based on decision trees which are capable of represent-  
116 ing non-linear dependencies between predictor and predictand. The parameter  
117 space is iteratively split with the goal to minimize a loss function. The sum of  
118 the linear decisions of each tree in the ensemble can then represent non-linear  
119 relationships. The manuscript is modified on p.3, l.24.

120 4. It is worth mentioning that the larger region encompassing the 4 subregions  
121 has been previously examined in Klein and Hartmann 1993.

122 This reference is added on p. 3, l.13: "In this study CF and REF are simulated  
123 based on a selected predictor set (AOD and meteorological parameters) in the  
124 SEA (10°–20° S, 0°–10° E, as analyzed in Klein and Hartmann (1993)) using  
125 Gradient Boosting Regression Trees (GBRTs)."

126

## 127 **References**

- 128 Adebiyi, A. A. and Zuidema, P. (2018). Low Cloud Cover Sensitivity to Biomass-  
129 Burning Aerosols and Meteorology over the Southeast Atlantic. *Journal of*  
130 *Climate*, 31(11):4329–4346.
- 131 Andersen, H. and Cermak, J. (2015). How thermodynamic environments control  
132 stratocumulus microphysics and interactions with aerosols. *Environmental*  
133 *Research Letters*, 10(2):024004.
- 134 Fuchs, J., Cermak, J., Andersen, H., Hollmann, R., and Schwarz, K. (2017). On  
135 the Influence of Air Mass Origin on Low-Cloud Properties in the Southeast  
136 Atlantic. *Journal of Geophysical Research: Atmospheres*, 122(20):11,076–  
137 11,091.
- 138 Grosvenor, D. P., Sourdeval, O., Zuidema, P., Ackerman, A., Alexandrov, M. D.,  
139 Bennartz, R., Boers, R., Cairns, B., Chiu, J. C., Christensen, M., Deneke,  
140 H. M., Diamond, M. S., Feingold, G., Fridlind, A., Hünerbein, A., Knist,  
141 C. L., Kollias, P., Marshak, A., McCoy, D., Merk, D., Painemal, D., Rausch,  
142 J., Rosenfeld, D., Russchenberg, H., Seifert, P., Sinclair, K., Stier, P., van  
143 Diedenhoven, B., Wendisch, M., Werner, F., Wood, R., Zhang, Z., and Quaas,  
144 J. (2018). Remote sensing of droplet number concentration in warm clouds:  
145 A review of the current state of knowledge and perspectives. *Reviews of*  
146 *Geophysics*.
- 147 Klein, S. and Hartmann, D. (1993). The seasonal cycle of low stratiform clouds.  
148 *Journal of Climate*, 6:1587–1606.
- 149 Klein, S. A. (1997). Synoptic Variability of Low-Cloud Properties and Meteorolo-  
150 gical Parameters in the Subtropical Trade Wind Boundary Layer. *Journal*  
151 *of Climate*, 10(8):2018–2039.

- 152 McCoy, D. T., Eastman, R., Hartmann, D. L., and Wood, R. (2017). The  
153 change in low cloud cover in a warmed climate inferred from AIRS, MODIS,  
154 and ERA-interim. *Journal of Climate*, 30(10):3609–3620.
- 155 Painemal, D., Kato, S., and Minnis, P. (2014). Boundary layer regulation in the  
156 southeast Atlantic cloud microphysics during the biomass burning season as  
157 seen by the A-train satellite constellation. *Journal of Geophysical Research:*  
158 *Atmospheres*, 119(19):11,288–11,302.
